# Supplementary material for: Aluminum nanotubes as an efficient catalyst for hydrogen production via thermochemical water splitting: a reactive molecular dynamics simulation
Source: Royal Society of Chemistry journal article supplement (doi:10.1039/d3cp00890h), 2023-01-01
Supplement: d3cp00890h1.pdf [file d3cp00890h1.pdf]

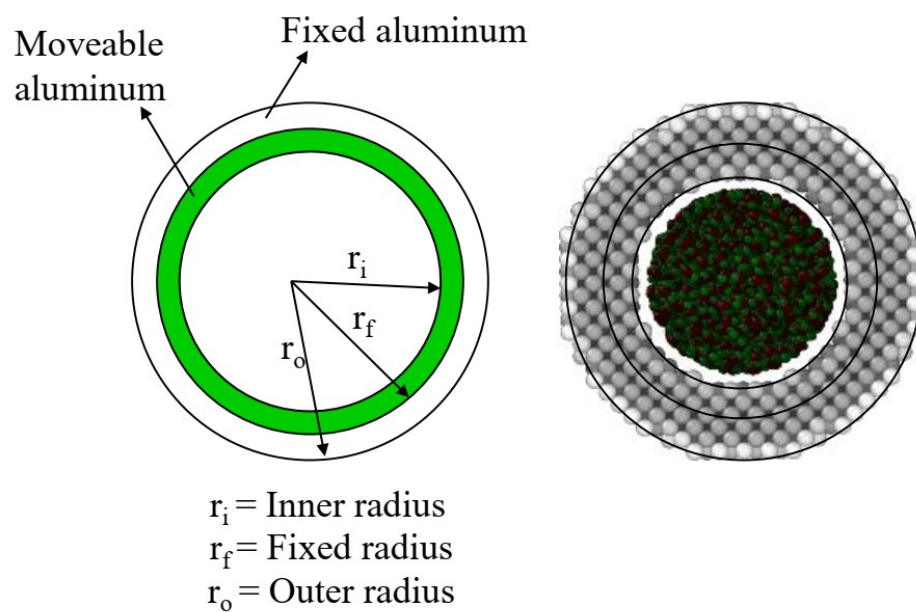

Figure S1 Design of an aluminum nanotube using reactive molecular dynamics simulations of water splitting.
